# Supplementary material for: A portable and reusable sensor system based on graphene for real-time and sensitive detection of lead ions in water
Source: Royal Society of Chemistry journal article supplement (doi:10.1039/d4en00884g), 2024-12-26
Supplement: d4en00884g1.pdf [file d4en00884g1.pdf]

## Supplementary Data

### **A Portable and Reusable Sensor System Based on Graphene for Real-Time and Sensitive Detection of Lead Ions in Water**

*Byunghoon Ryu<sup>1,2,+</sup>, Wen Zhuang<sup>1,3,+</sup>, Hyun-June Jang<sup>1,3</sup>, Zhenwei Gao<sup>1,3</sup>, Yuqin Wang<sup>1,3</sup>, and  
Junhong Chen<sup>1,3,\*</sup>*

*<sup>1</sup>Chemical Sciences and Engineering Division, Physical Sciences and Engineering Directorate,  
Argonne National Laboratory, Lemont, Illinois 60439, USA.*

*<sup>2</sup>Department of Mechanical Engineering, Inha University, Incheon, 22212, Republic of Korea.*

*<sup>3</sup>Pritzker School of Molecular Engineering, University of Chicago, Chicago, Illinois 60637,  
USA.*

*\*Contact Email: [junhongchen@anl.gov](mailto:junhongchen@anl.gov), [junhongchen@uchicago.edu](mailto:junhongchen@uchicago.edu)*

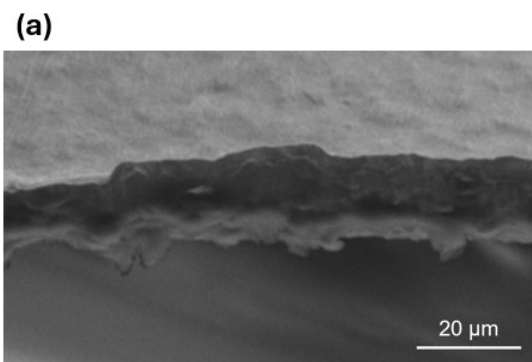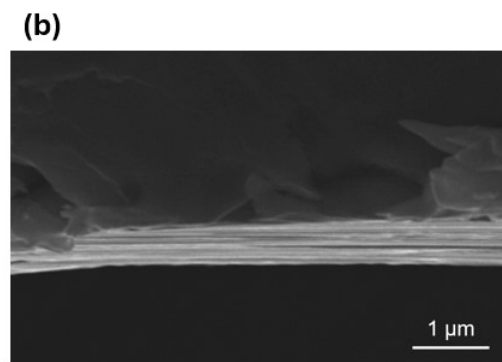

**Figure S1.** Cross-section SEM images of the full coverage films from (a) pristine graphene ink and (b) 3x diluted graphene ink.

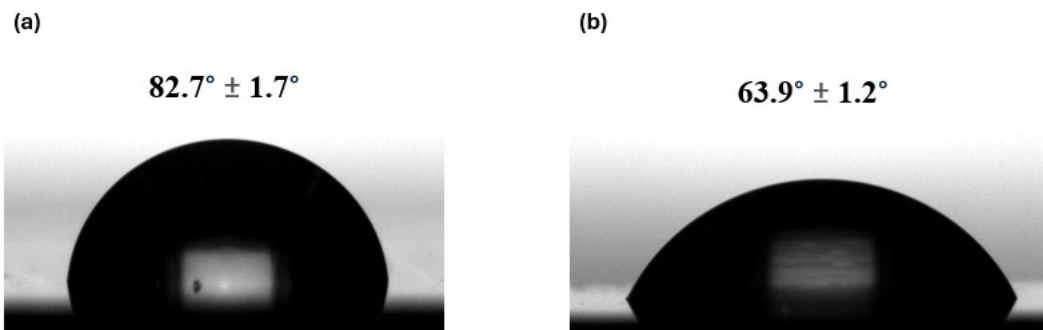

**Figure S2.** Contact angle measurements and analysis of (a) pristine graphene thin film and (b) PBA-functionalized graphene thin film.

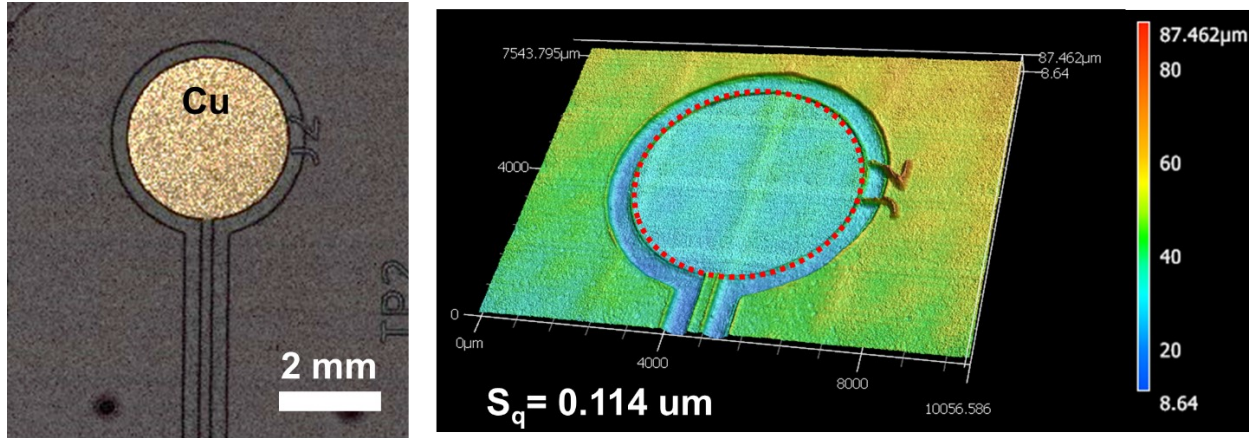

**Figure S3.** Confocal micrographs of a bare Cu pad on a sensor PCB showing the surface roughness ( $S_q$ ) of 0.114  $\mu\text{m}$ . The surface roughness ( $S_q$ ) of Si wafer is 0.022  $\mu\text{m}$  for comparison.

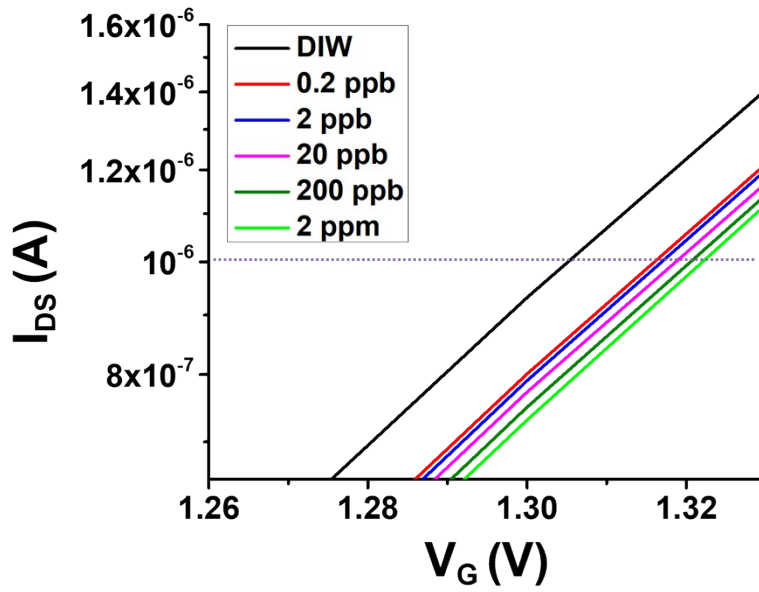

**Figure S4.** Transfer curves of the MOSFET upon detection of lead ions ranging from 0.2 ppb to 2 ppm using thick G-film sensor.

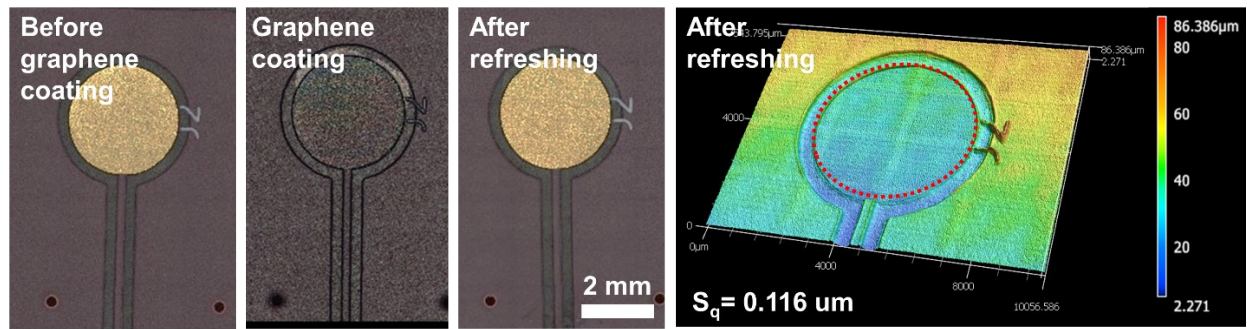

**Figure S5.** Confocal micrographs of a Cu pad from a sensor PCB before and after the refreshing process. The surface roughness ( $S_q$ ) of the Cu pad after refreshing is 0.116  $\mu\text{m}$ , comparable to that of the original Cu pad.

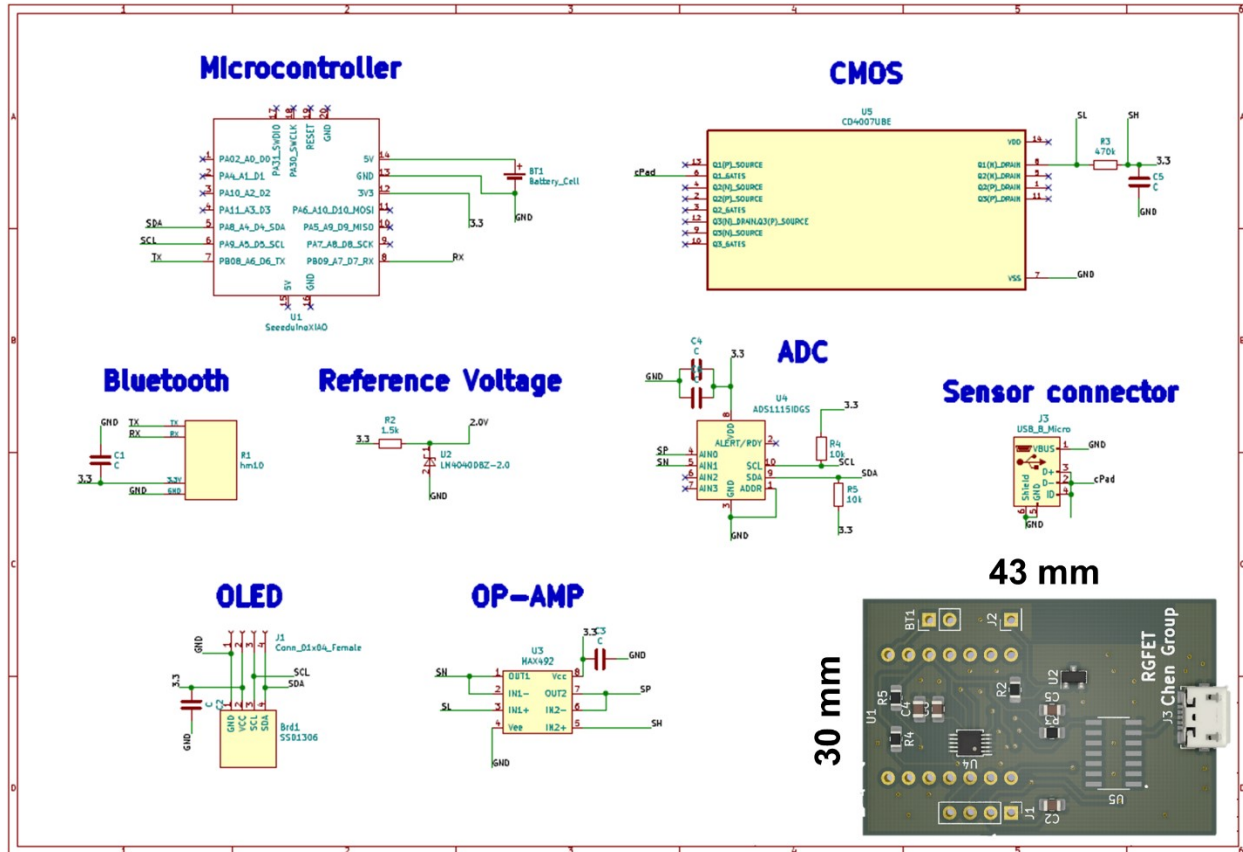

Figure S6. A circuit diagram of the portable sensor analyzer.

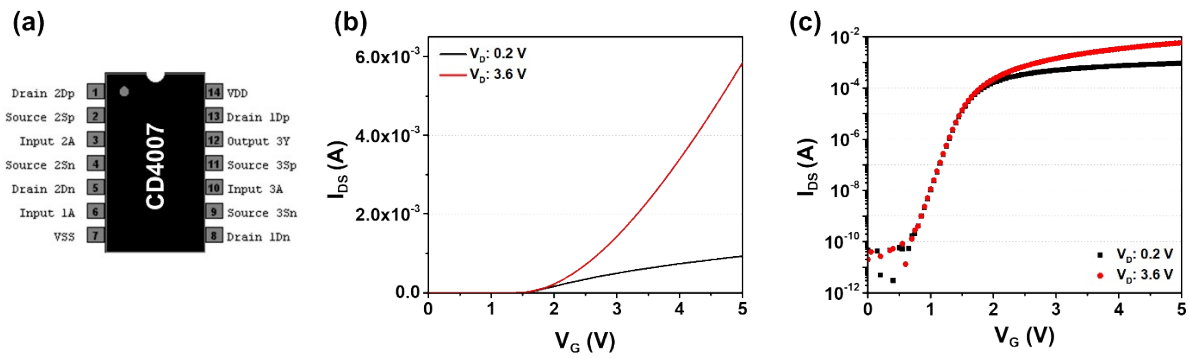

**Figure S7.** Characterization of a commercial n-type MOSFET. (a) A MOSFET (CD4007) used to construct the portable sensor system. (b) Transfer characteristic curves of the MOSFET as a function of gate and drain voltages. (c) Semi-logarithmic curves of those shown in (b).



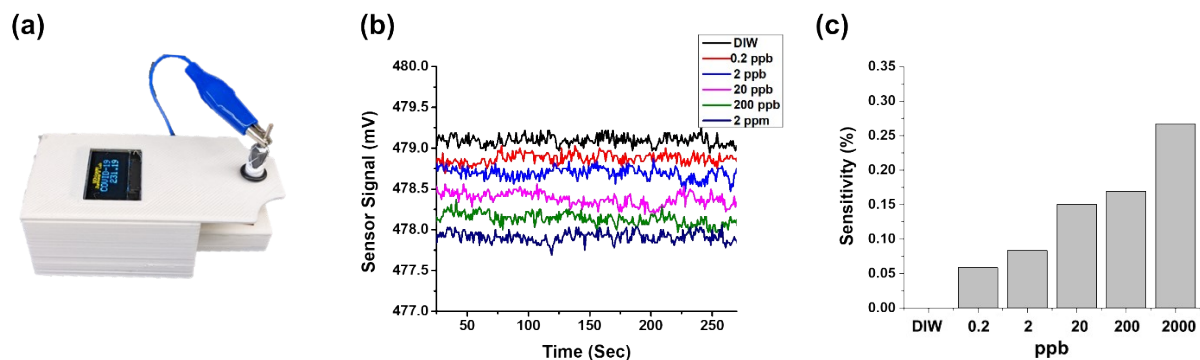

**Figure S8.** Lead ion detection using the portable sensor system. (a) The portable sensor with a sensor PCB bearing a thick G-film. (b) A real-time detection with respect to lead ion concentrations. (c) Sensitivity of the portable sensor toward lead ions using the thick G-film.
